# Supplementary material for: Soil organic matter oxidation by hydroxyl radical: an overlooked route of greenhouse gas production in drylands
Source: Research Square preprint supplement (doi:10.21203/rs.3.rs-4728483/v1), 2024-07-17
Supplement: Supplementary file 1 [file 47a9f2822d26995e8662c82c.docx]

**Soil organic matter oxidation by hydroxyl radical: an overlooked route of greenhouse gas production in drylands**

Xing Guo1,2, Yongxing Lu1, Jungang Yang1, Fan Du1, Yakov Kuzyakov3,4, Yuanhe Yang5, Shen Yu6, Shuping Qin7, Qinglong Fu8, Xiaoying Rong1, Benfeng Yin1, Kai Shi1, Xiangfang Lv9, Yuanming Zhang1, Xiaobing Zhou1,*

1. Key Laboratory of Ecological Safety and Sustainable Development in Arid Lands, Xinjiang Institute of Ecology and Geography, Chinese Academy of Sciences, 830011 Urumqi, China.
2. University of the Chinese Academy of Sciences, 100049 Beijing, China.
3. Department of Soil Science of Temperate Ecosystems, Department of Agricultural Soil Science, University of Goettingen, 37077 Göttingen, Germany.
4. Peoples Friendship University of Russia (RUDN University), 117198 Moscow, Russia.
5. State Key Laboratory of Vegetation and Environmental Change, Institute of Botany, Chinese Academy of Sciences, 100093 Beijing, China.
6. Key Laboratory of Urban Environment and Health, Institute of Urban Environment, Chinese Academy of Sciences, 361021 Xiamen, China.
7. Key Laboratory of Soil Ecology, Key Laboratory of Agricultural Water Resources, Center for Agricultural Resources Research, Institute of Genetic and Developmental Biology, Chinese Academy of Sciences, 050021 Hebei, China.
8. School of Environmental Studies, China University of Geoscience, 430074 Wuhan, China.
9. Urumqi Ecological Environment Monitoring Station, 830011 Urumqi, China.

Corresponding author:

Xiaobing Zhou, [zhouxb@ms.xjb.ac.cn.](mailto:zhouxb@ms.xjb.ac.cn;)

**Supplementary method 1:**

To verify that the decrease in CO2, N2O release from simulated rainfall under 10% methanol conditions was mainly due to the effect of ·OH rather than changes in microbial community structure, a control experiment was additionally designed. This experiment simulates rainfall scenarios with a control group (Under water) and an experimental group (Under water with ·OH quencher). Notably, at the onset of the simulated rainfall experiment, both the control and experimental groups were incubated with pure water for 12 hours. The purpose was to ensure the microbial community structures of both groups remained consistent. After the 12-hour incubation period, methanol was added to the experimental group to quench ·OH, and after one hour of further incubation, the changes in the accumulated production of CO2 and N2O were compared. The short-term addition of methanol does not alter the microbial community structure but can rapidly quench ·OH (Supplementary Fig. 9). After 10% methanol was added for 1 h, CO2 accumulation decreased 18%, 59% and 54% compared to control in Bare, Cyan/Lich and Moss crusted soil , respectively. Similarly, N2O accumulation decreased 29%, 52% and 53% in Bare, Cyan/Lich and Moss crusted soil, respectively. Therefore the removal of ·OH by methanol was the reason affecting the decrease of CO2 and N2O accumulation (Supplementary Fig. 11).

The specific steps are as follows: 100 g of soil sample was placed into a conical flask equipped with a rubber stopper and a three-way valve, uniformly mixed with 5 mL of pure water solution, and incubated for 12 hours. After this period, an additional 5 mL of pure water was added to the control flask, while a 20% methanol solution (resulting in a final methanol concentration of 10%) was added to the experimental flask, which was then immediately sealed with a rubber stopper. One hour later, a syringe was used to extract 50 mL of gas, which was then injected into a gas collection bag for the detection of accumulated concentrations of CO2 and N2O using a gas chromatograph (Agilent 7890B, Agilent, Germany).

**Supplementary method 2:**

Prior to FT-ICR MS analyses, WEOC extraction was first performed1. 100 g of soil was placed into a 250 mL conical flask at a soil-to-water ratio of 1:1, to which 100 mL of pure water was added. The mixture was then shaken for 24 hours. The solution collected was centrifuged at 4000 RCF for 10 minutes, followed by filtration through a 0.45 μm filter membrane, and then collected into a pre-acidified bottle. Subsequently, the WEOC solution was divided into two portions: one served as a control, while the other was quantitatively added with Fenton reagent based on the concentration of ·OH produced 24 hours after rainfall events (Fig. 1), to observe changes in the content and component structure of WEOC before and after the reaction.

Specifically, the pH of the WEOC solution was adjusted to 3, and 4 mg of FeSO4·7H2O was added to 50 mL of WEOC solution2. Based on the soil types of Bare, Cyan/Lich, and Moss crusted soil, 0.4, 1.1, and 1.6 mL of 5 mmol L-1 H2O2 were added to the WEOC, respectively, resulting in solution H2O2 concentrations of 40, 110, and 160 μmoL L-1, and the final ·OH concentrations generated were approximately 1.7, 4.9, and 7.1 μmol L-1 (Supplementary Fig. 12). After standing for 1 hour, changes in WEOC concentration before and after the Fenton reaction were detected using a carbon-nitrogen analyzer (Multi N/C 2100, Analytik Jena, Germany). The remaining samples were adjusted to pH 2 with hydrochloric acid, stored in the dark at 4°C, and prepared for subsequent FT-ICR MS analysis.

**Supplementary Tables**

Supplementary Table 1: Main inorganic mineral components of soil

| Major minerals | content(%) | | |
| --- | --- | --- | --- |
| Bareland | cyanobacteria/lichen | Moss |
| SiO2 | 87.86 | 82.17 | 78.90 |
| Al2O3 | 7.47 | 10.28 | 12.56 |
| Fe2O3 | 1.82 | 3.77 | 4.13 |
| K2O | 1.66 | 1.97 | 1.99 |
| TiO2 | 0.33 | 0.53 | 0.72 |
| P2O5 | 0.15 | 0.17 | 0.23 |
| MnO | 0.07 | 0.08 | 0.07 |
| Cr2O3 | 0.06 | 0.08 | 0.05 |

Supplementary Table 2: PCR primers for nitrifying and denitrifying functional genes

| Gene | Primer | Sequence 5’- 3’ |
| --- | --- | --- |
| AOA | AOA-F | GACTACATMTTCTAYACWGAYTGGGC |
| AOA-R | GGKGTCATRTATGGWGGYAAYGTTGG |
| AOB | AOB-F | GGGGTTTCTACTGGTGGT |
| AOB-R | CCCCTCKGSAAAGCCTTCTTC |
| narG | narG-F | TAYGTSGGGCAGGARAAACTG |
| narG-R | CGTAGAAGAAGCTGGTGCTGTT |
| nirS | nirS-F | GTSAACGTSAAGGARACSGG |
| nirS-R | GASTTCGGRTGSGTCTTGA |
| nirK | nirK-F | ATCATGGTSCTGCCGCG |
| nirK-R | GCCTCGATCAGRTTGTGGTT |
| nosZ | nosZ-F | CGYTGTTCMTCGACAGCCAG |
| nosZ-R | CGSACCTTSTTGCCSTYGCG |

**Supplementary Figures**


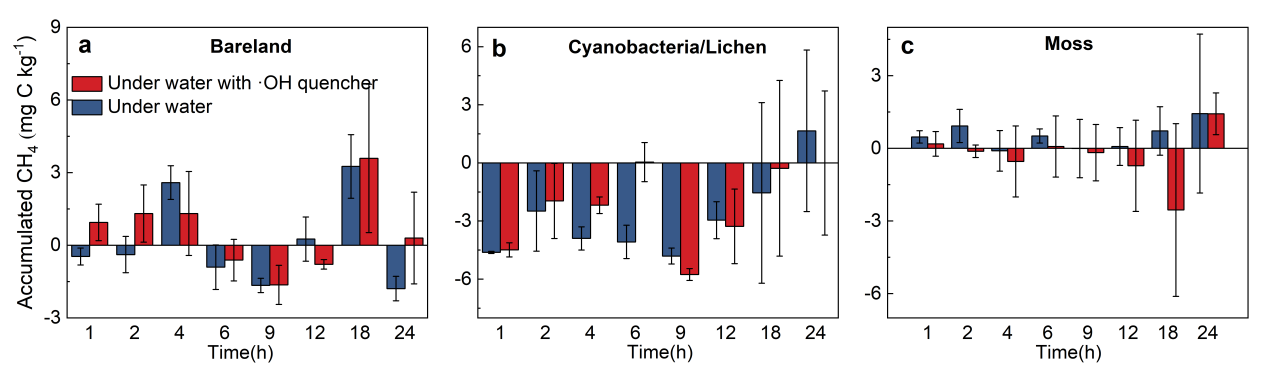


Supplementary Fig. 1 CH4 accumulation in soil from bareland (a), cyanobacteria/lichen (b), and moss crusted soil (c) rainfall event. Rainfalls were simulated under H2O and under H2O with ·OH quencher. ·OH quencher was 10% methanol. Data are presented as the means ± Standard Error. Significant differences between groups are denoted by letters (*p* < 0.05), and significance within groups is denoted by * (*: *P* < 0.05).


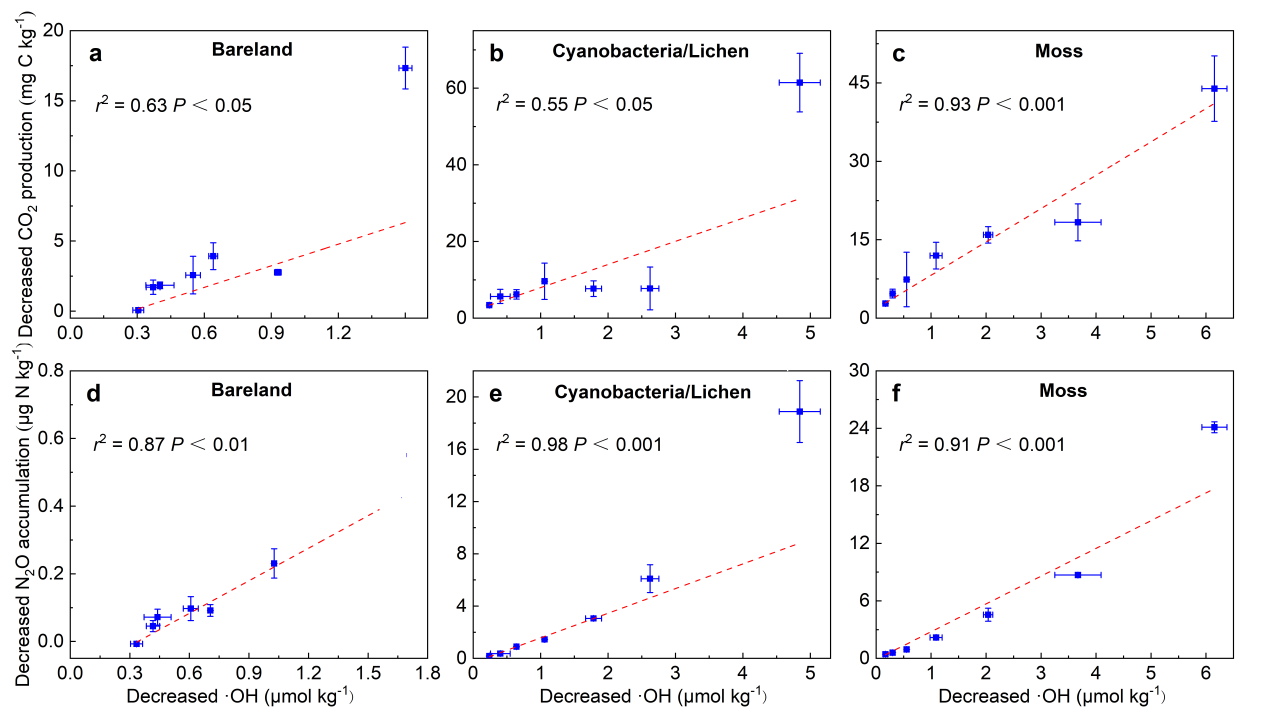


Supplementary Fig. 2 Relationships between decreased CO2 and N2O production and decreased ·OH content under ·OH quencher after rainfall event. Bareland (a, d), cyanobacteria/lichen (b, e), and moss crusted soil (c, f).


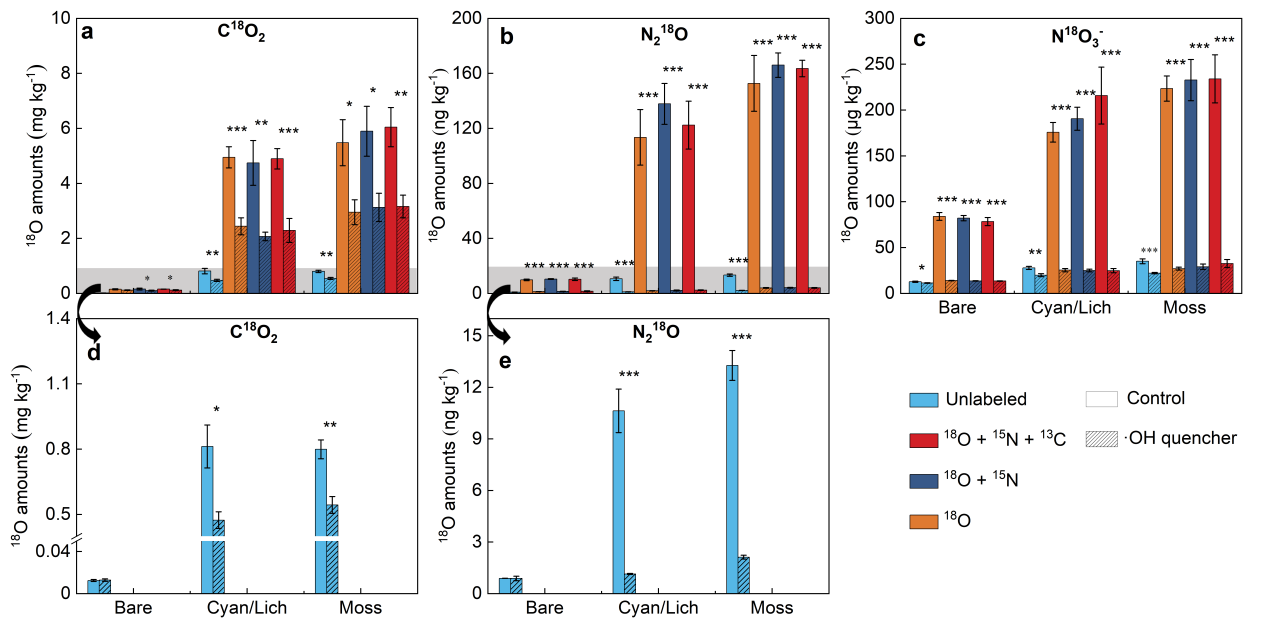


Supplementary Fig. 3 18O content in CO2 (a, d), N2O (b, e) and NO3- (c) after 24 h rainfall events where d, e represent the gray-black areas in a, b respectively. The isotope labels are light blue: unlabeled, brown: 18O labeled, dark blue: 18O + 15N labeled, and red: 18O + 15N + 13C labeled. Rainfalls were simulated under H2O and under H2O with ·OH quencher. ·OH quencher was 10% methanol. Data are presented as the means ± Standard Error. Significance within groups is denoted by * (*: *P* < 0.05).


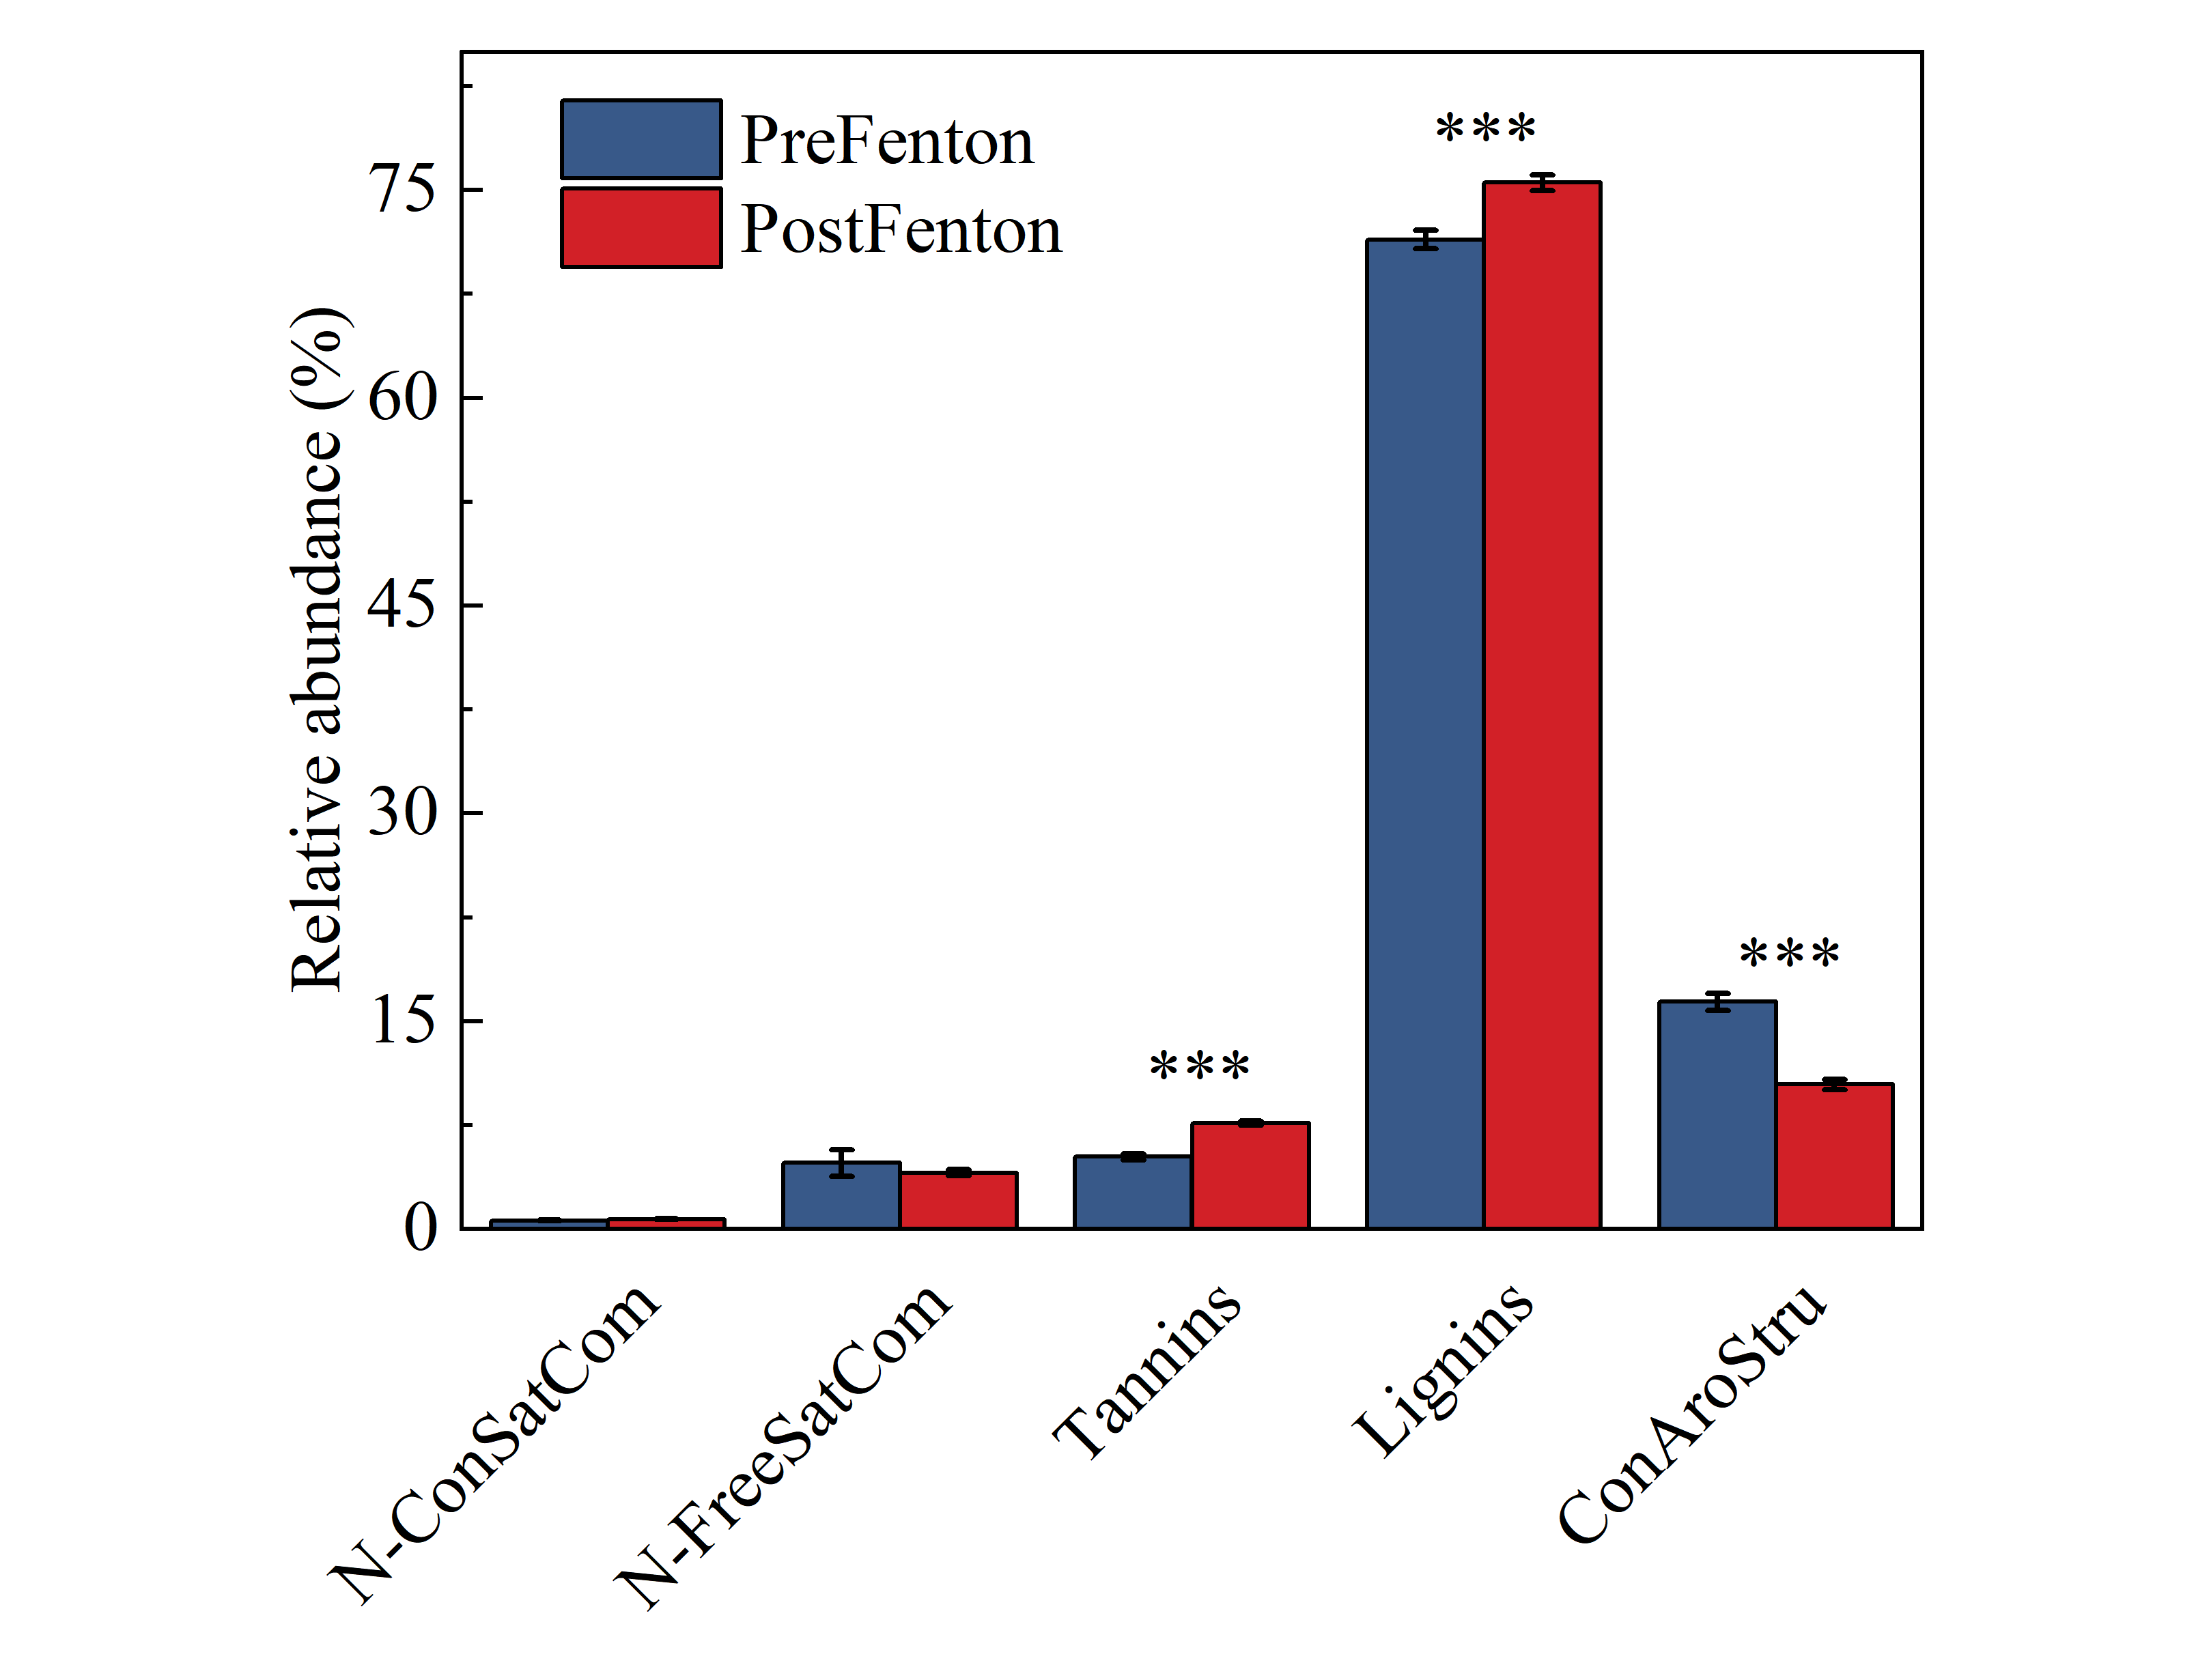


Supplementary Fig. 4 Structure of WEOC before and after the Fenton reaction. N-ConSatCom: Nitrogen-saturated compounds; N-FreeSatCom: Nitrogen-free saturated compounds; ConAroStru: Condensed aromatic structures. Data are presented as the means ± Standard Error. Significance within groups is denoted by * (*: *P* < 0.05).


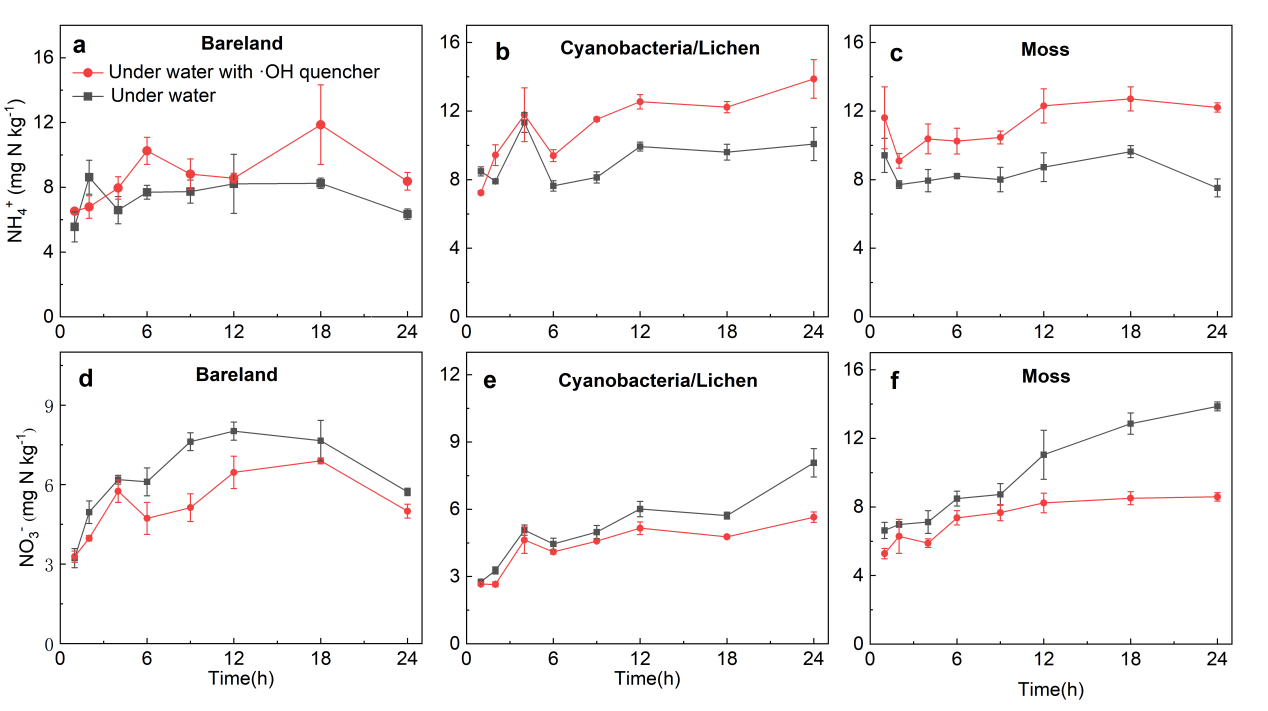
Supplementary Fig. 5 NH4+ and NO3- content in soil from bareland (a, d), cyanobacteria/lichen (b, e), moss crusted soil (c, f) after rainfall event. Rainfalls were simulated under H2O and under H2O with ·OH quencher. ·OH quencher was 10% methanol. Data are presented as the means ± Standard Error. Significance within groups is denoted by * (*: *P* < 0.05).


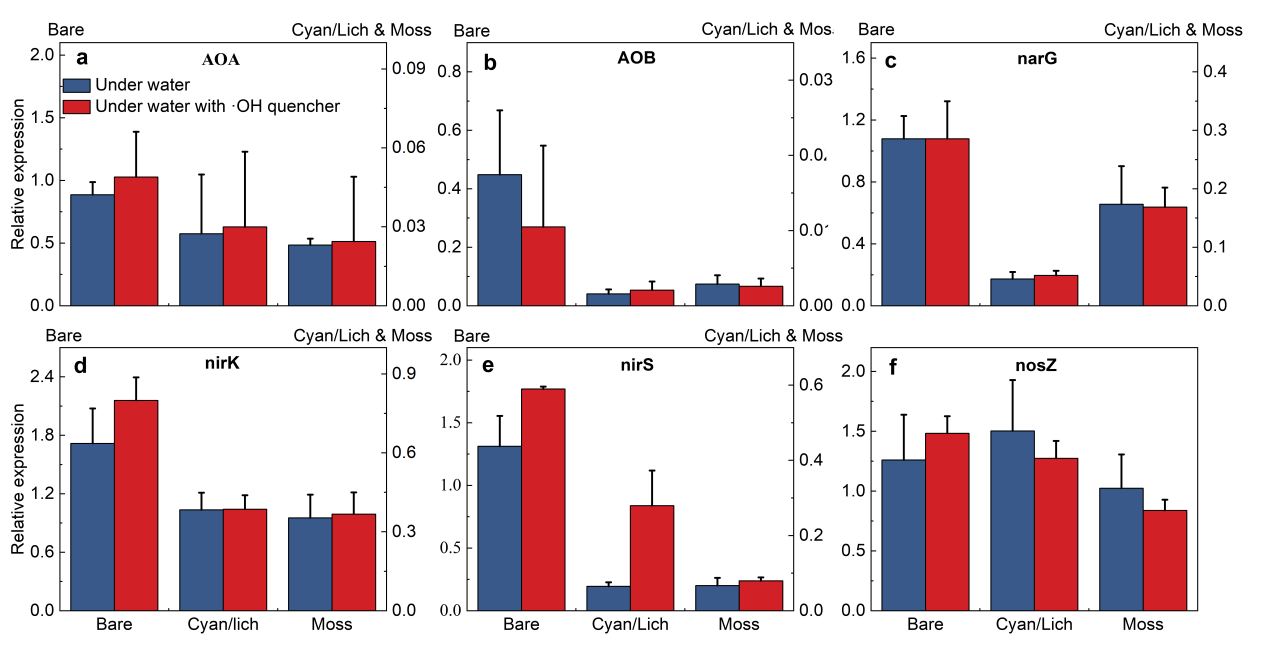


Supplementary Fig. 6 Relative expression of nitrification and denitrification functional genes of bareland, cyanobacteria/lichen, moss crusted soil 24 h after rainfall events. AOA (a), AOB (b), narG (c), nirK (d), nirS (e), nosZ (f). Rainfalls were simulated under H2O and under H2O with ·OH quencher. ·OH quencher was 10% methanol. Data are presented as the means ± Standard Error. Significance within groups is denoted by * (*: *P* < 0.05).

**
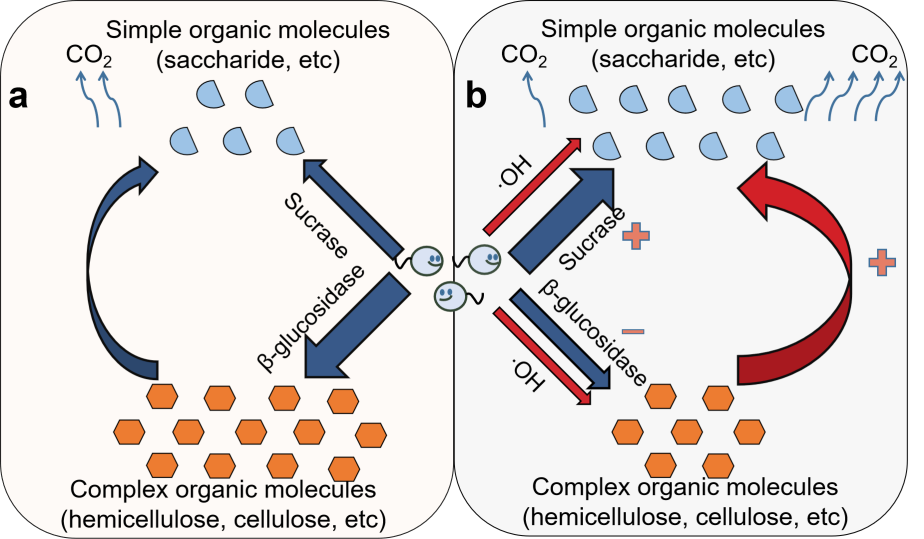
**

Supplementary Fig. 7 Conceptual diagram reflecting how ·OH facilitate the CO2 production. a: the traditional view on enzymatic processes of organic matter decomposition, b: illustrates the synergistic effects of ·OH with enzymatic reactions. The symbols "+" and "-" represent the positive and negative impacts of the addition of ·OH on each process, relative to the traditional view, respectively. The production of ·OH not only oxidizes complex organic matter into simpler forms but also allows microorganisms to optimize energy allocation by reducing the synthesis of complex organic matter decomposing enzymes and increasing the synthesis of enzymes that break down simpler organic matter. This, in turn, facilitates the CO2 production.


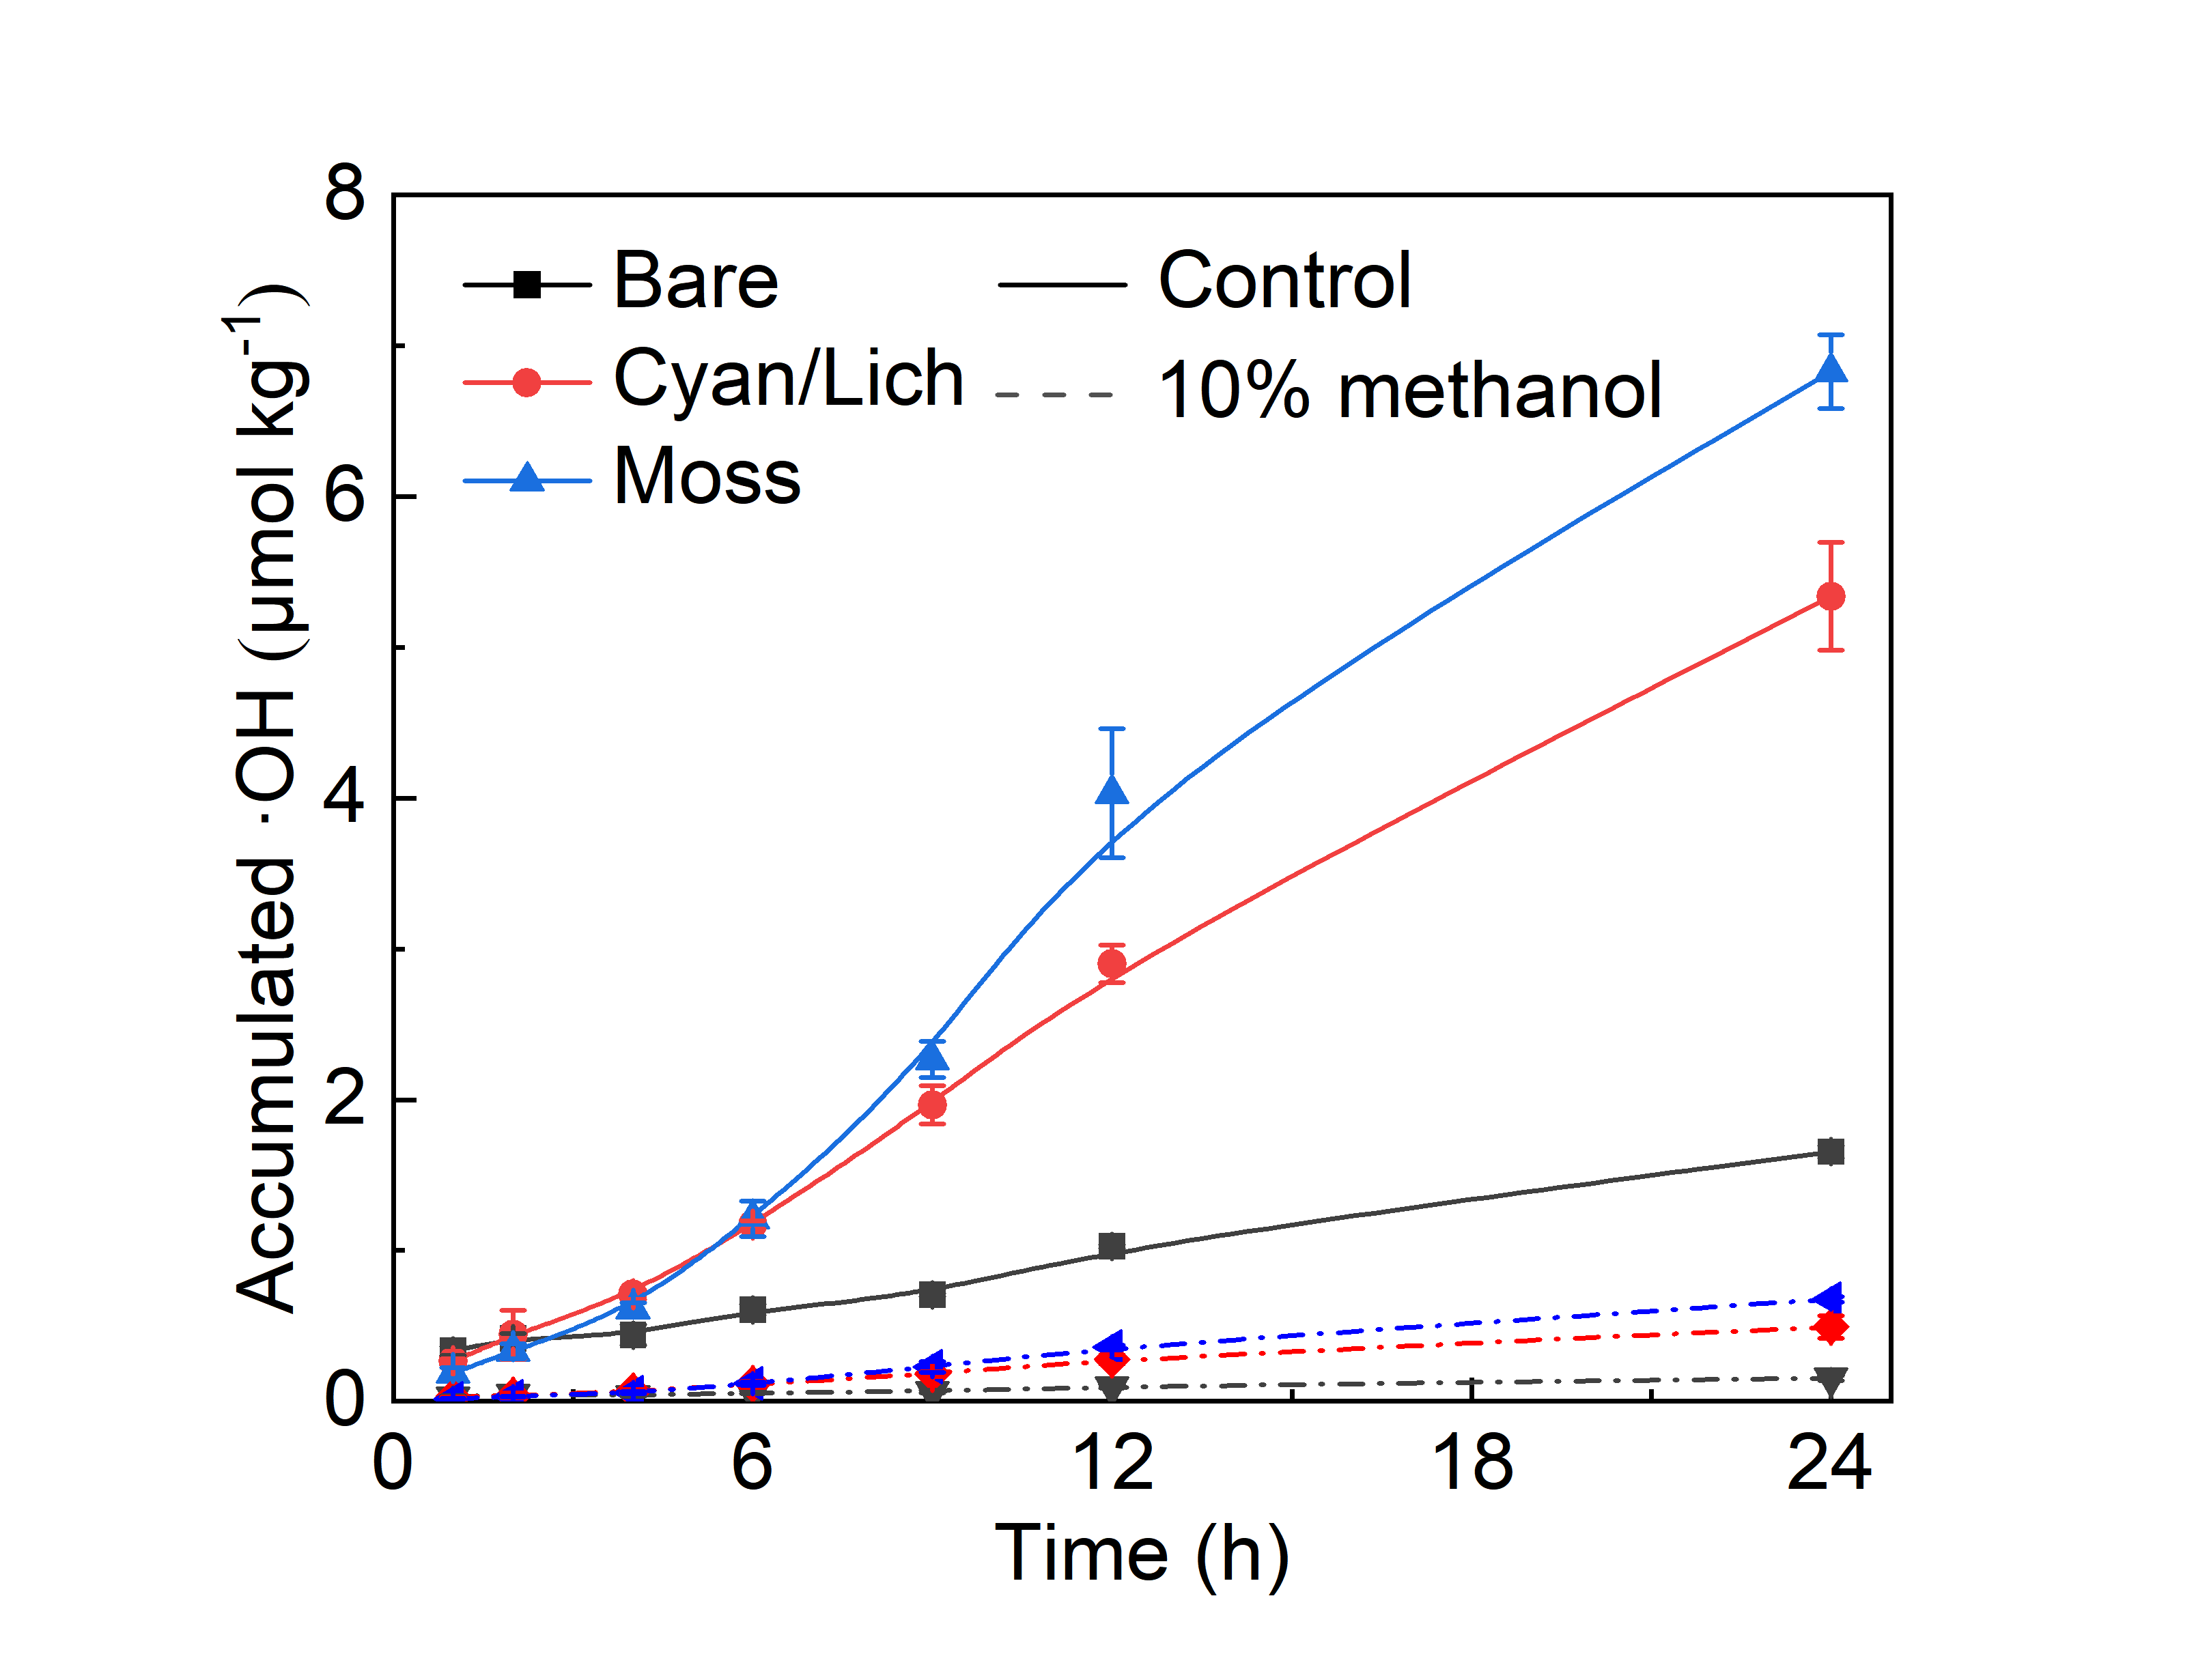


Supplementary Fig. 8 The dynamic of accumulation of ·OH under 10% methanol condition after rainfall event. The black, blue and red lines indicate bareland, cyanobacteria/lichen, moss crusted soil, respectively. The solid line indicates no treatment Control, and the dashed line indicates 10% methanol addition treatment. Data are presented as the means ± Standard Error.


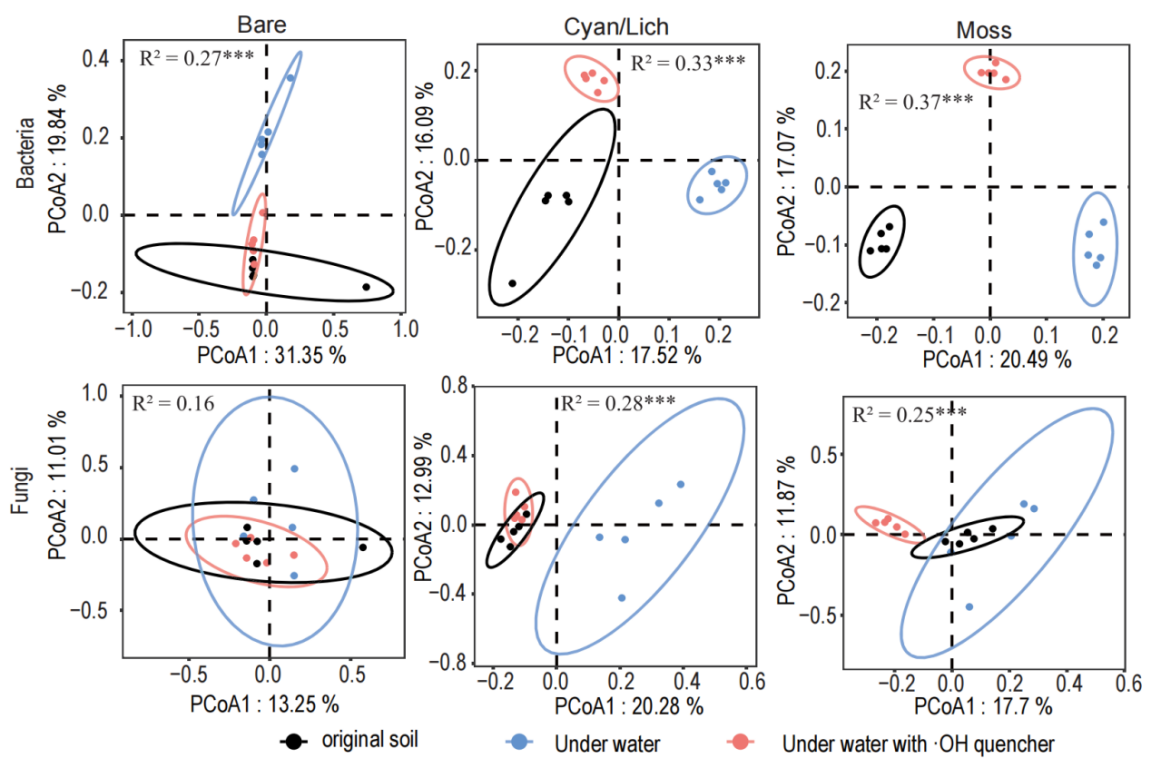


Supplementary Fig. 9 Microbial community structure in bareland, cyanobacteria/ lichen, moss crusted soil. Rainfalls were simulated under H2O and under H2O with ·OH quencher. In contrast to the original soil, Under H2O, Under H2O with ·OH quencher conditions, the structure of the bacterial and fungal microbial communities of all crust types was significantly altered, except for the bareland fungal community, which did not change significantly.


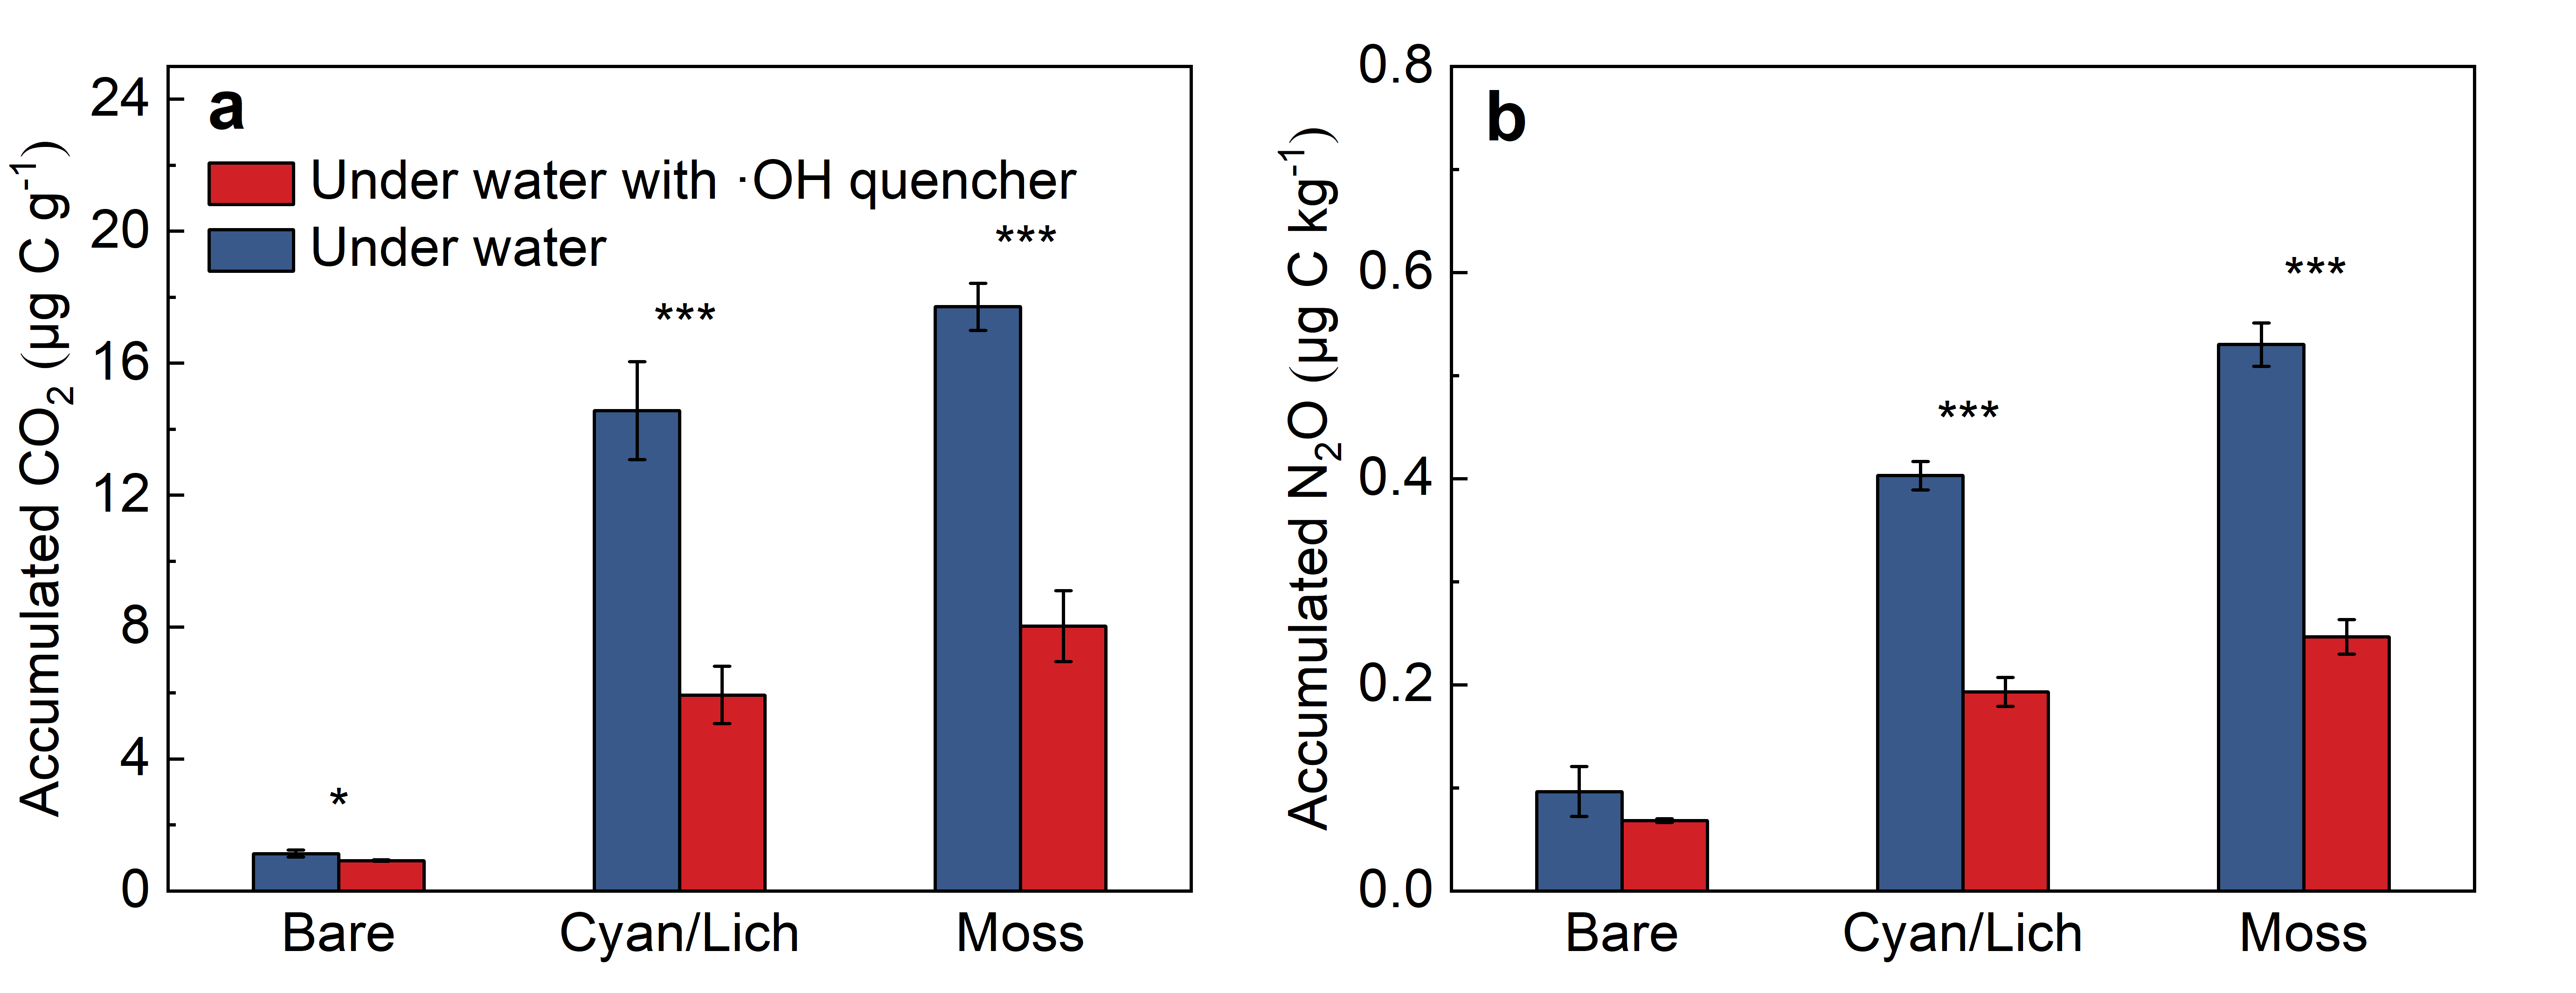


Supplementary Fig. 10 Effect of 10% methanol addition in soil CO2 (a) and N2O (b) accumulation. Data are presented as the means ± Standard Error. Significance within groups is denoted by * (*: *P* < 0.05).


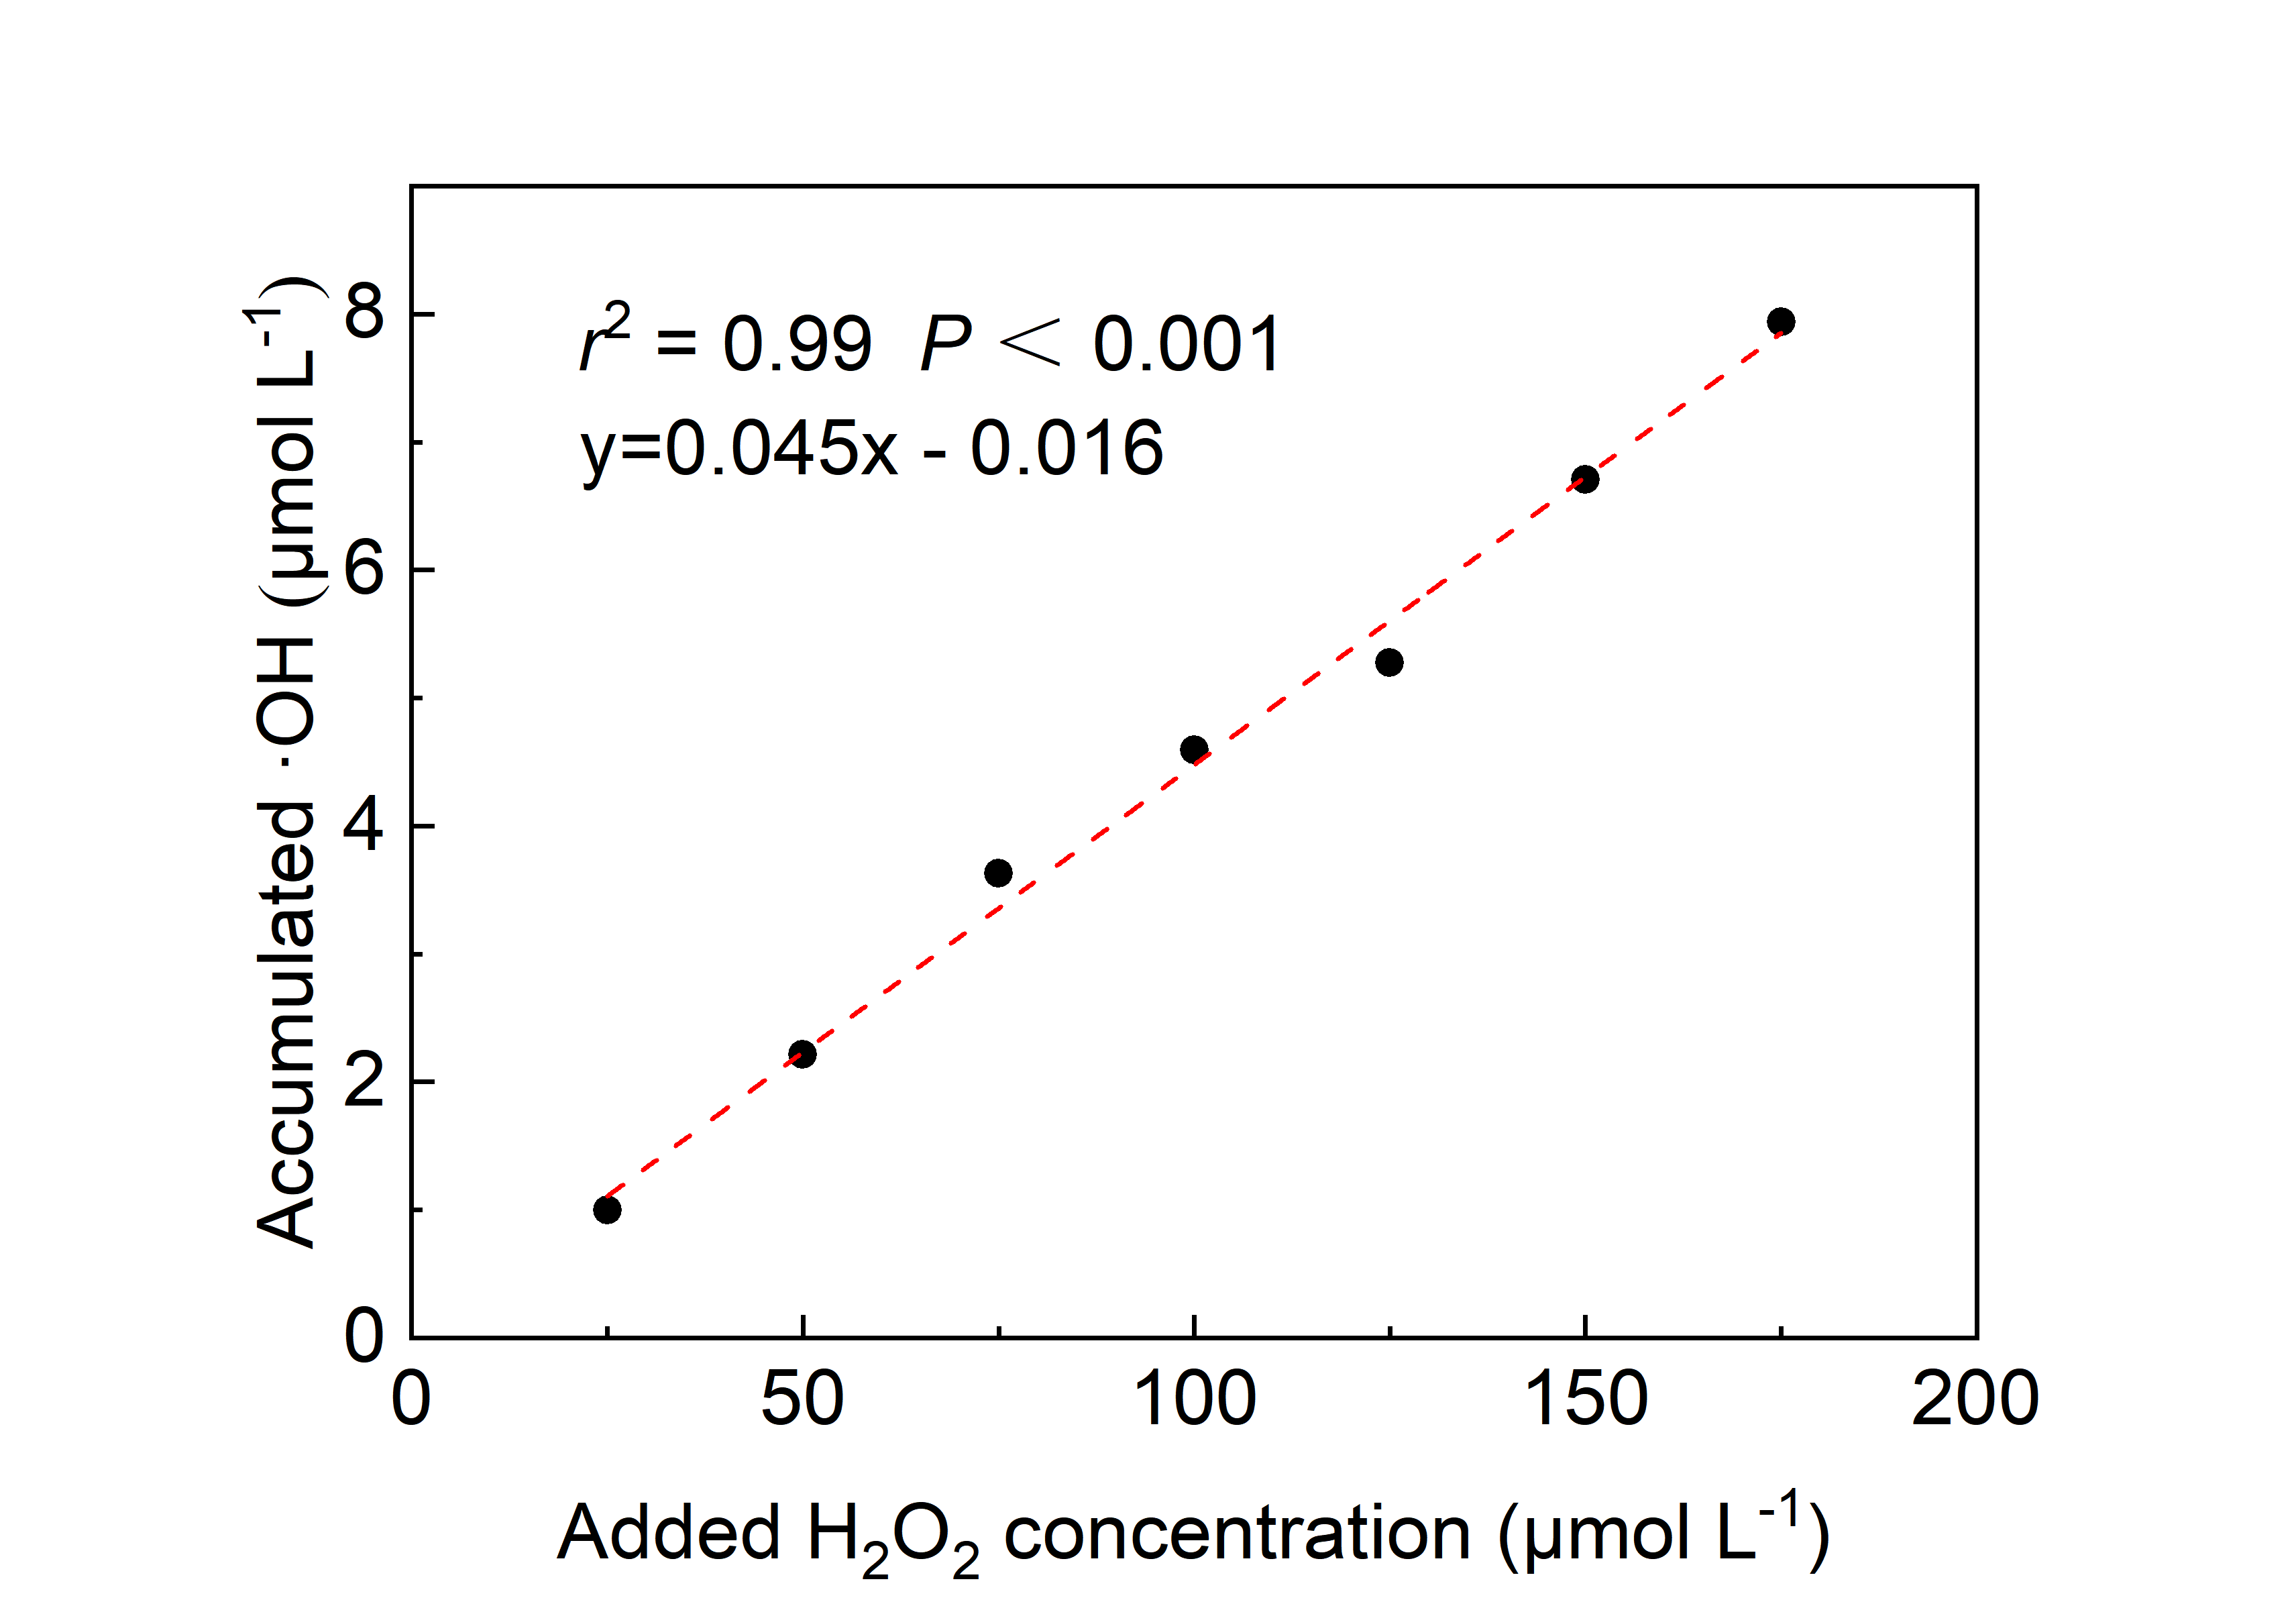


Supplementary Fig. 11 Correlation between added H2O2 concentration and ·OH production.

**References**

1. Huang, Z.Q., Xu, Z.H., Chen, C.R. Effect of mulching on labile soil organic matter pools, microbial community functional diversity and nitrogen transformations in two hardwood plantations of subtropical Australia. *Appl. Soil Ecol.* 40, 229-239(2008).
2. Patel, K.F., Tejnecký, V., Ohno, T., Bailey, V.L., Sleighter, R.L., Hatcher, P.G. Reactive oxygen species alter chemical composition and adsorptive fractionation of soil-derived organic matter. *Geoderma* 384, 114805 (2021).
